# Supplementary material for: Synthesis and Structural Characterization of Half-Sandwich Arene–Ruthenium(II) Complexes with Bis(imidazol-1-yl)methane, Imidazole and Benzimidazole
Source: MDPI journal article supplement (doi:10.3390/inorganics9050034), 2021-05-04
Supplement: s1 [file s1]

# Supplementary Materials: Synthesis and Structural Characterization of Half-Sandwich Arene–Ruthenium(II) Complexes with Bis(imidazol-1-yl)methane, Imidazole and Benzimidazole

Vladislava V. Matveevskaya <sup>1,2</sup>, Dmitry I. Pavlov <sup>1</sup>, Denis G. Samsonenko <sup>1</sup>, Ekaterina A. Ermakova <sup>3</sup>, Lyubov S. Klyushova <sup>3</sup>, Sergey V. Baykov <sup>4</sup>, Vadim P. Boyarskiy <sup>4</sup> and Andrei S. Potapov <sup>1,\*</sup>

<sup>1</sup> Nikolaev Institute of Inorganic Chemistry, 3 Lavrentiev Ave., 630090 Novosibirsk, Russia; vvm40@tpu.ru (V.V.M.); pavlov@niic.nsc.ru (D.I.P.); denis@niic.nsc.ru (D.G.S.)

<sup>2</sup> Kizhner Research Center, Tomsk Polytechnic University, 30 Lenin Ave., 634050 Tomsk, Russia

<sup>3</sup> Institute of Molecular Biology and Biophysics—Subdivision of Federal Research Center of Fundamental and Translational Medicine, 2/12 Timakova Str., 630060 Novosibirsk, Russia; ermakova2299@gmail.com (E.A.E.); klyushovals@mail.ru (L.S.K.)

<sup>4</sup> Institute of Chemistry, Saint Petersburg State University, 26 Universitetskii Prospect, 198504 Peterhof, Russia; sergei.v.baikov@yandex.ru (S.V.B.); v.boiarskii@spbu.ru (V.P.B.)

\* Correspondence: potapov@niic.nsc.ru; Tel.: +7-(383)-330-92-56

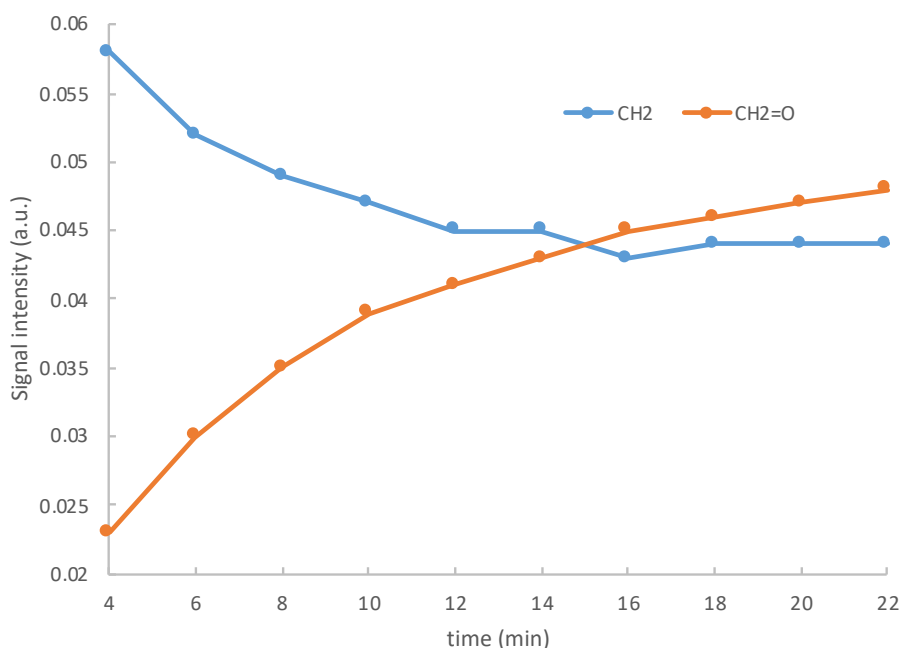

**Figure S1.** Change in relative intensities of methylene signals of L1 (CH<sub>2</sub>) and formaldehyde (CH<sub>2</sub>=O). Integral intensities were determined relative to solvent residual peak of acetonitrile.

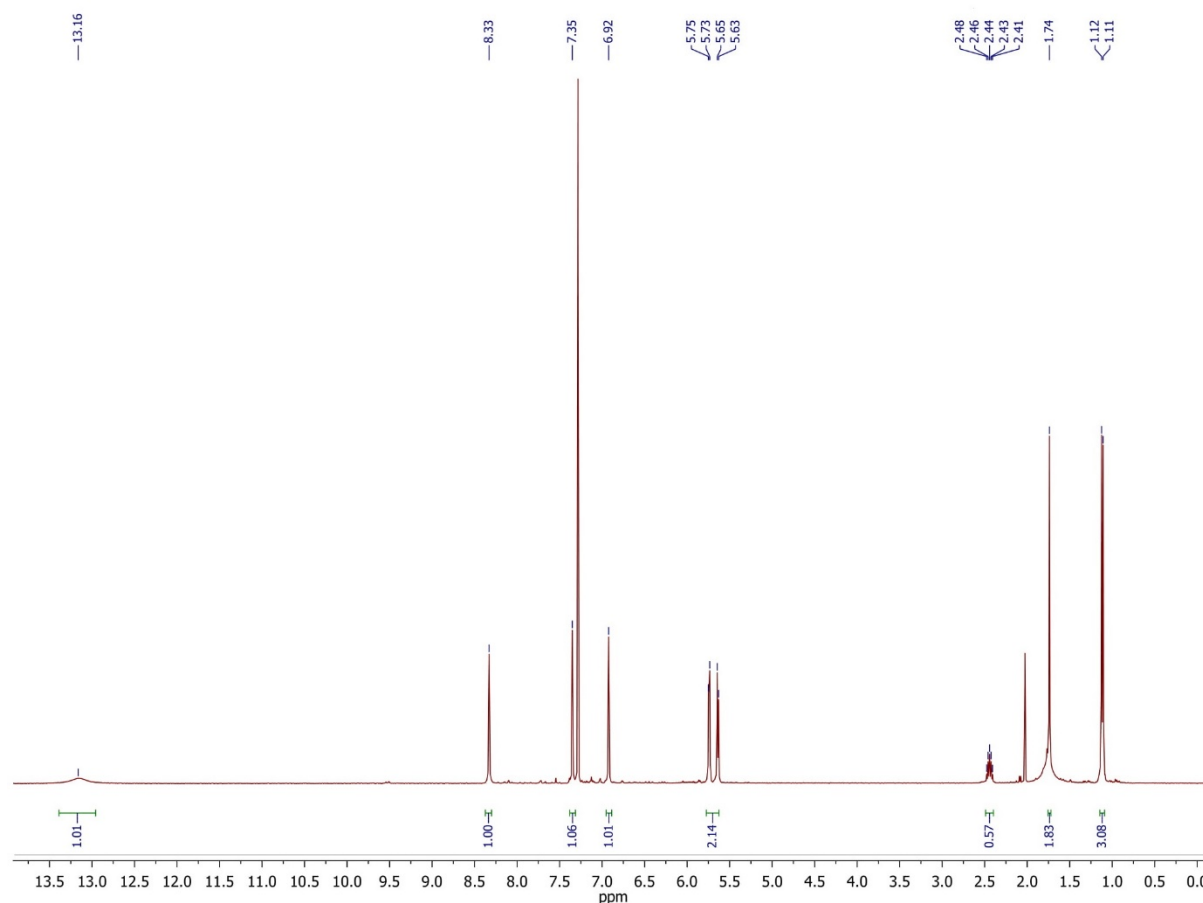

**Figure S2.** <sup>1</sup>H NMR spectrum of complex 1 in DMSO-d<sub>6</sub>

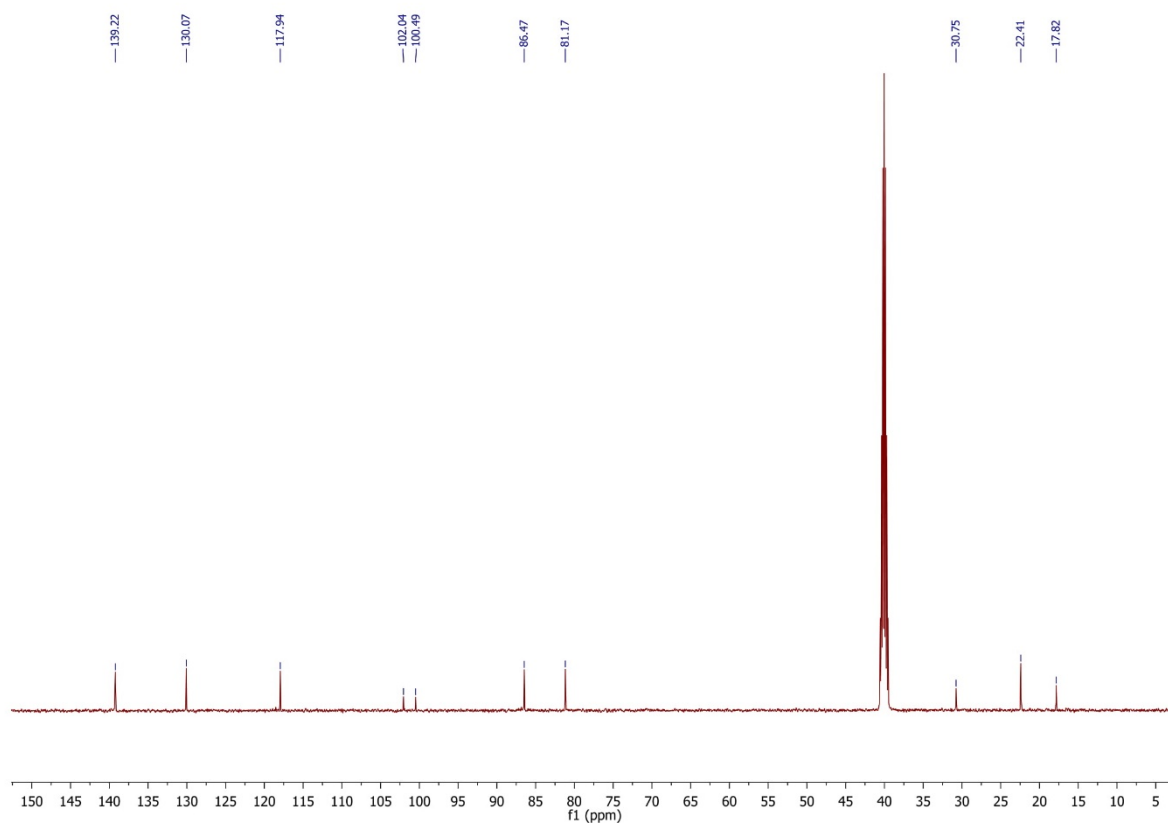

**Figure S3.** <sup>13</sup>C NMR spectrum of complex 1 in DMSO-d<sub>6</sub>

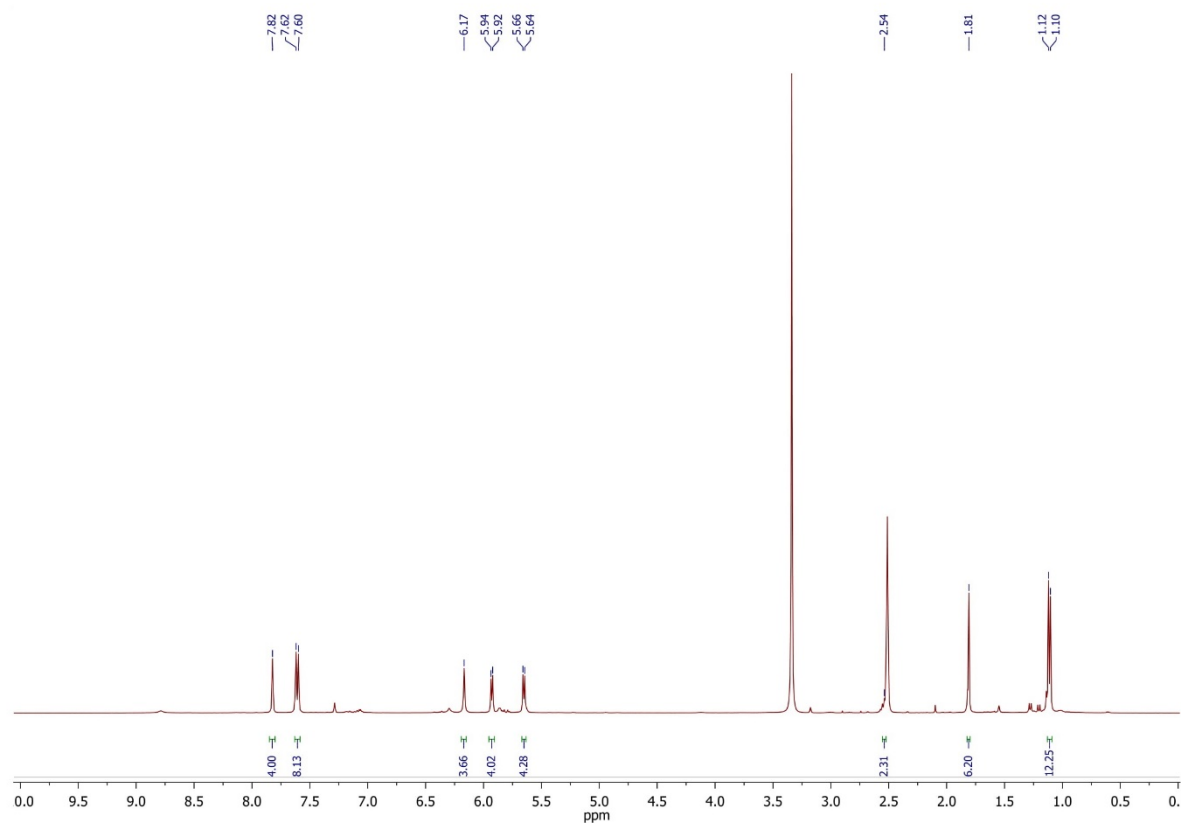

**Figure S4.** <sup>1</sup>H NMR spectrum of complex 2 in DMSO-d<sub>6</sub>

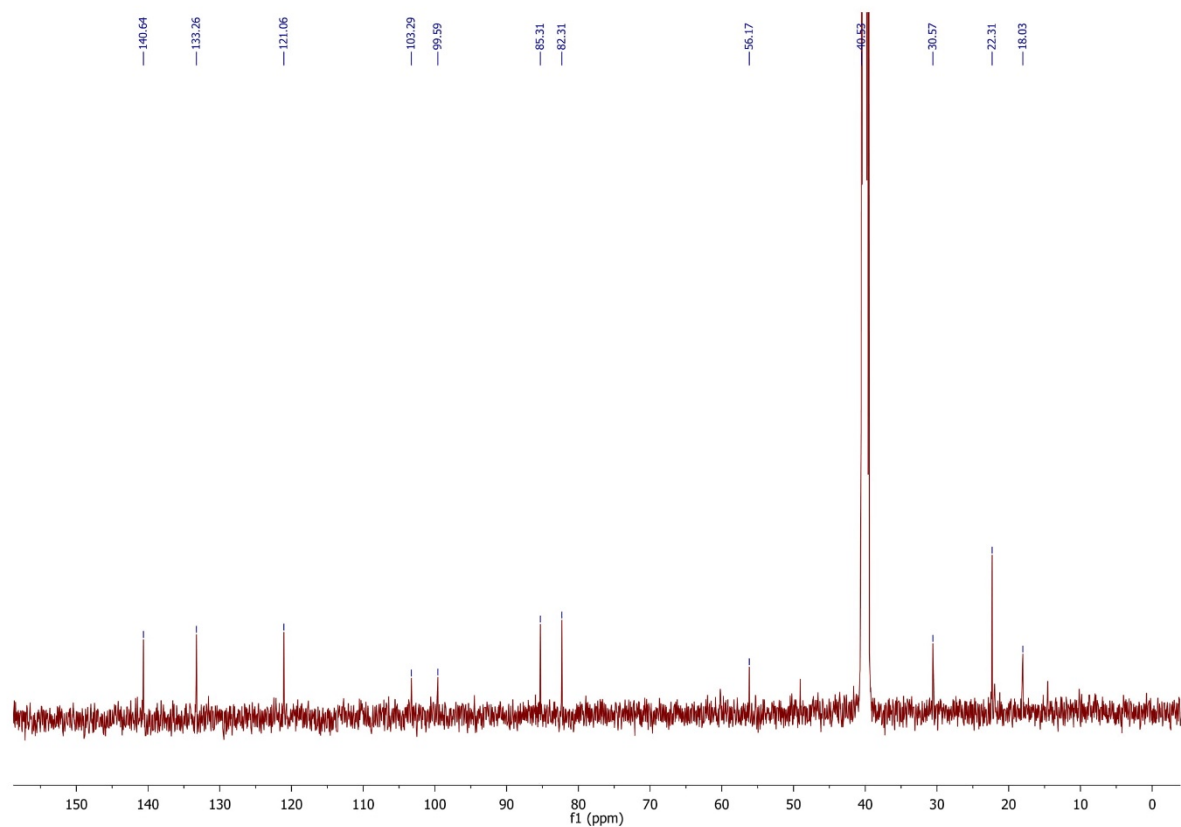

**Figure S5.** <sup>13</sup>C NMR spectrum of complex 2 in DMSO-d<sub>6</sub>

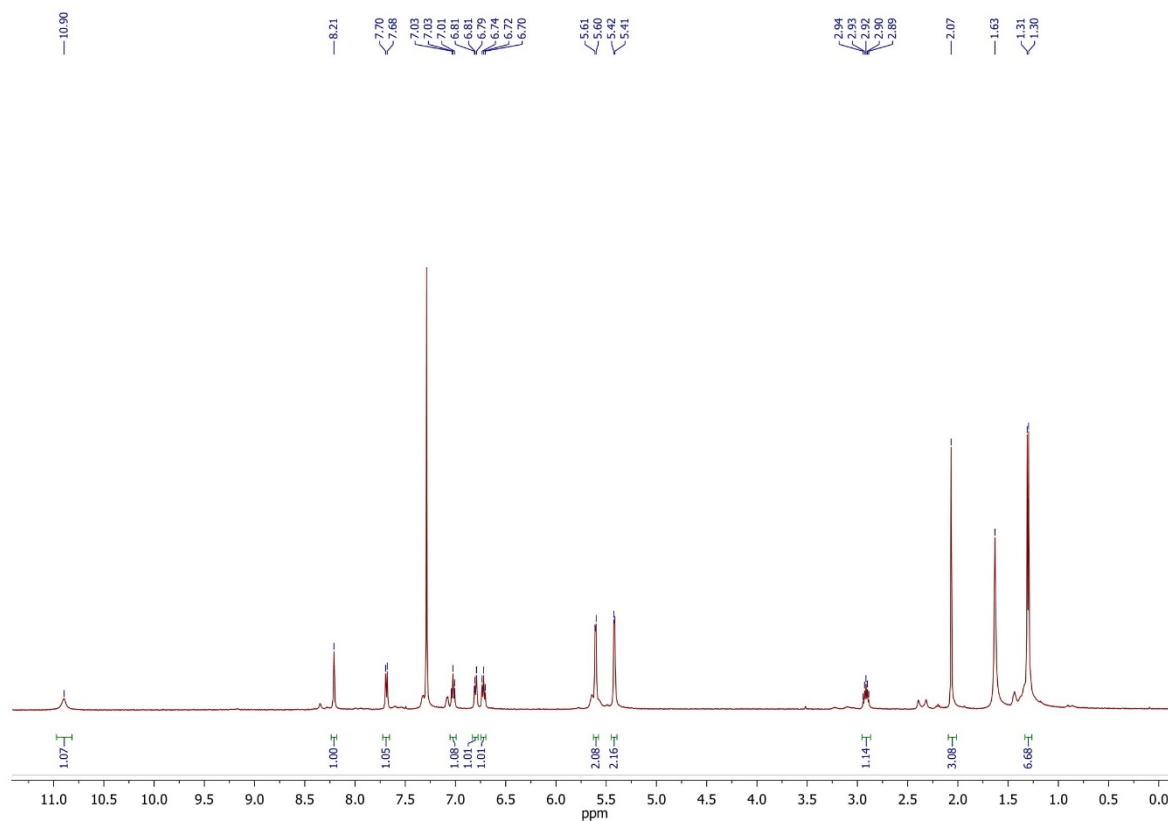

**Figure S6.** <sup>1</sup>H NMR spectrum of complex **3** in CDCl<sub>3</sub>

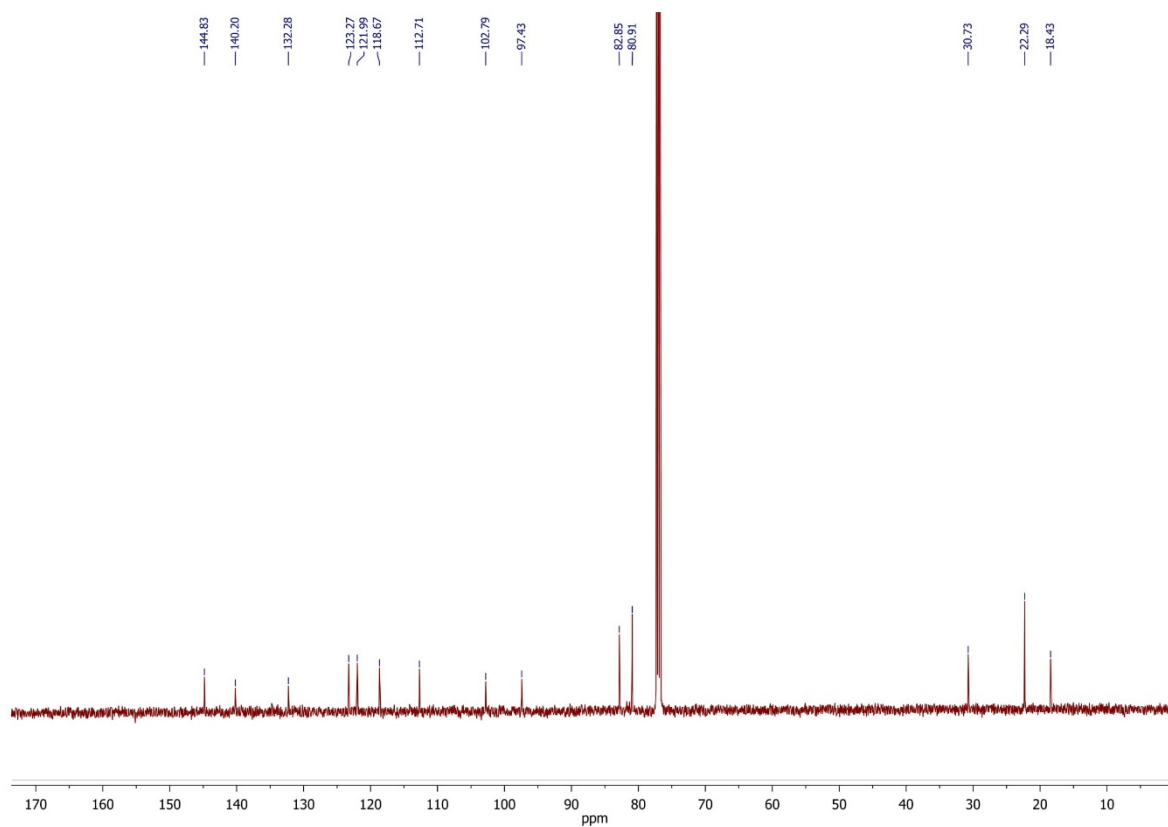

**Figure S7.** <sup>13</sup>C NMR spectra of complex **3** in CDCl<sub>3</sub>

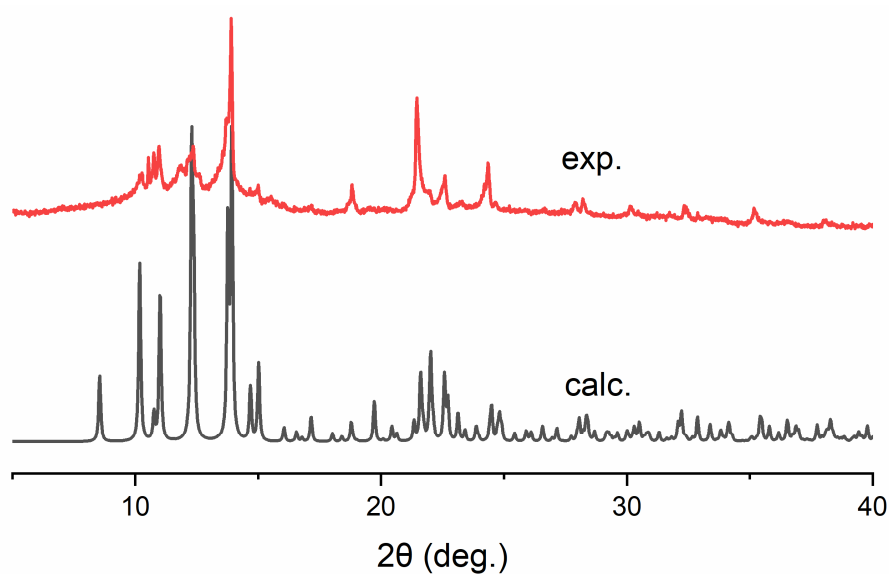

**Figure S8.** Experimental and calculated powder X-ray diffraction patterns of complex 1.

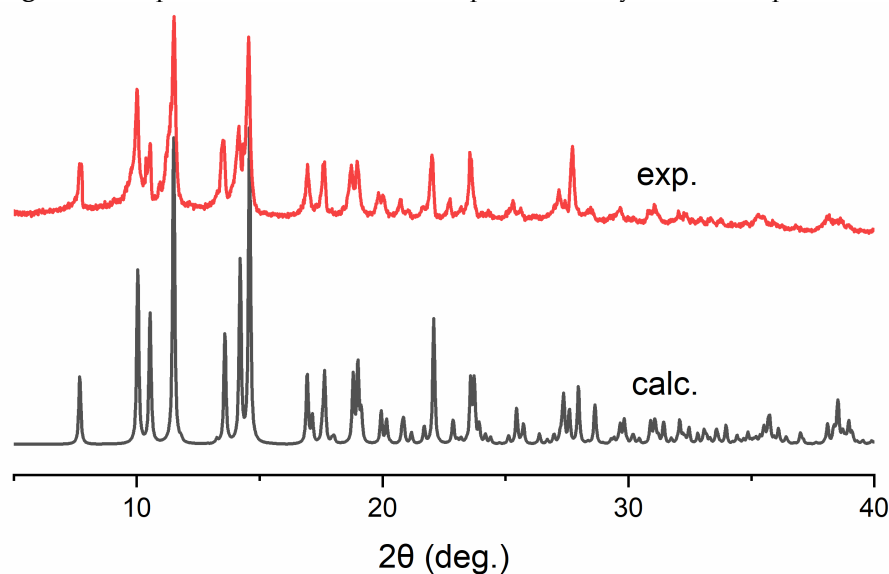

**Figure S9.** Experimental and calculated powder X-ray diffraction patterns of complex 2.

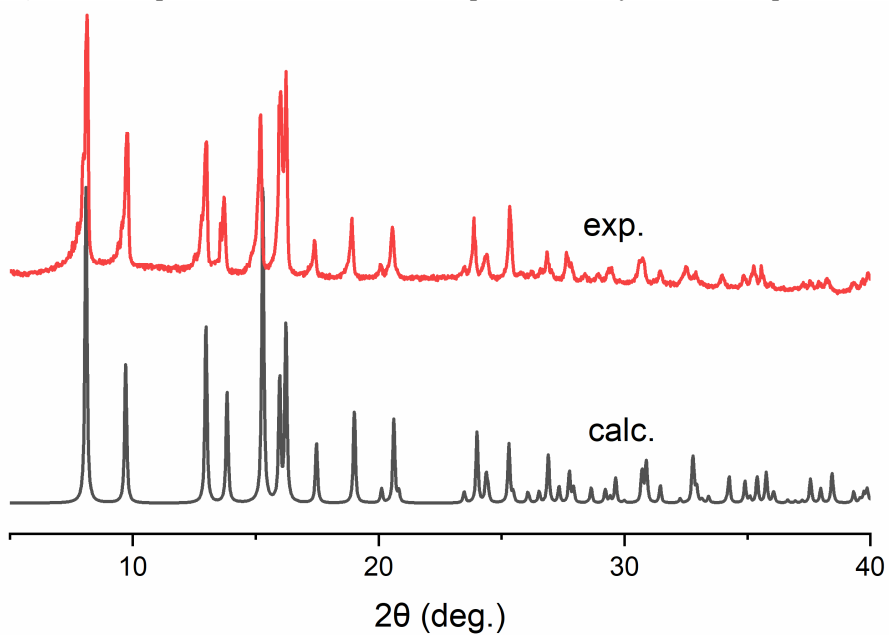

**Figure S10.** Experimental and calculated powder X-ray diffraction patterns of complex 3.

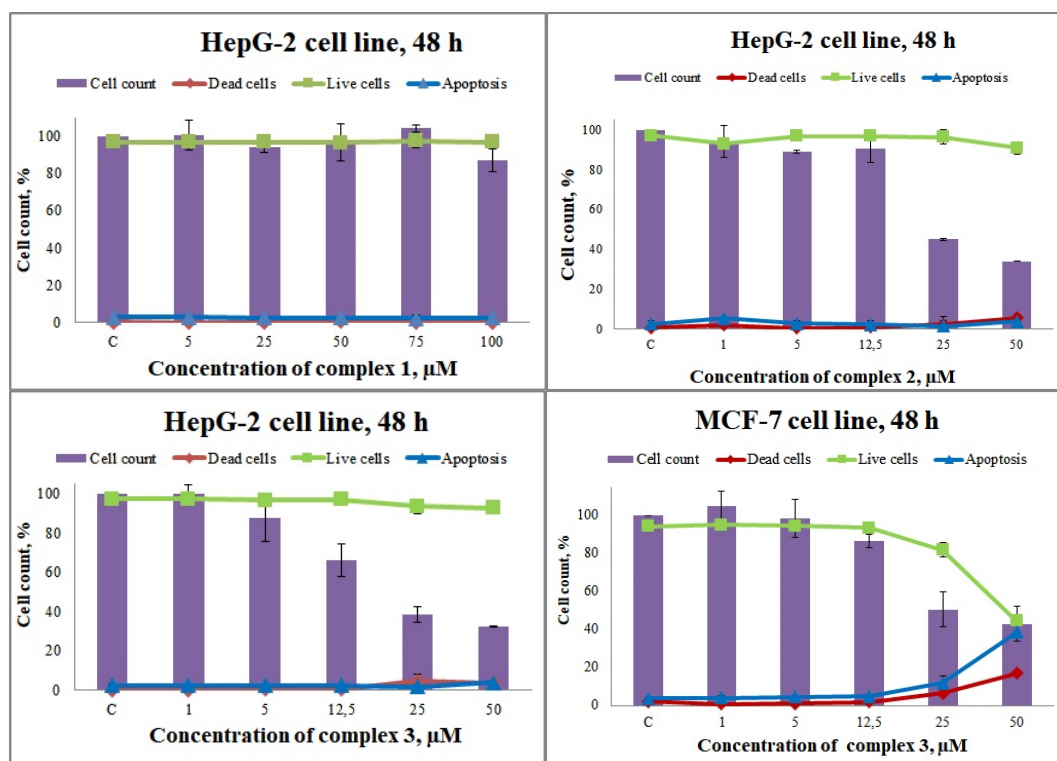

**Figure S11.** Effect of complexes 1-3 on the viability of HepG2 and MCF-7 cells determined by dual staining with Hoechst 33342/propidium iodide.

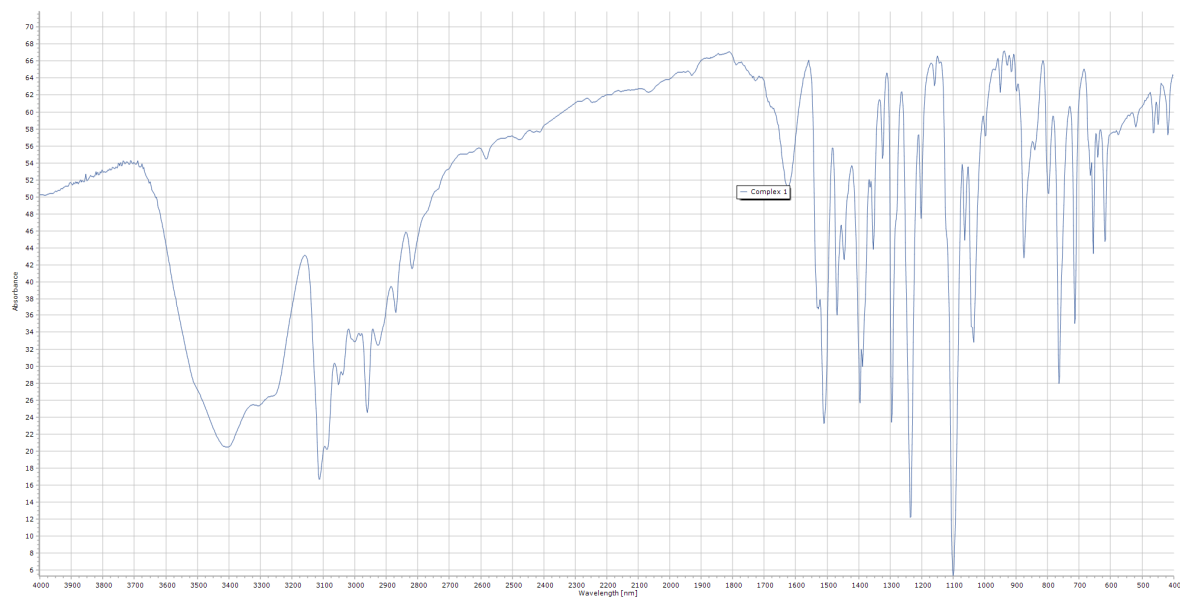

**Figure S12.** FT-IR spectrum of complex 1

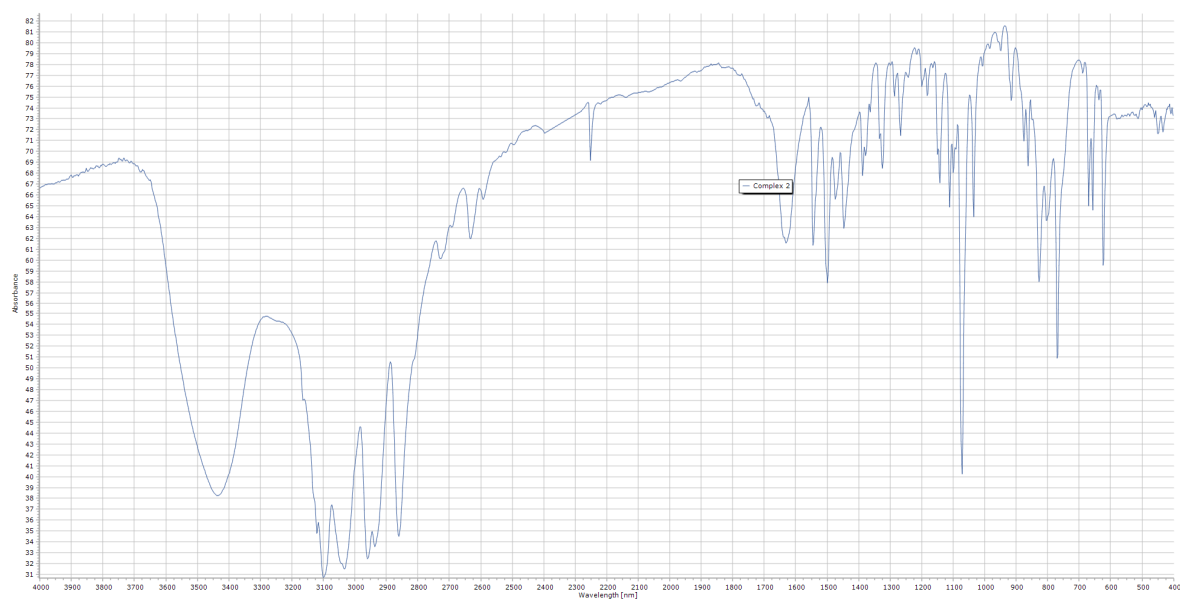

**Figure S13.** FT-IR spectrum of complex 2

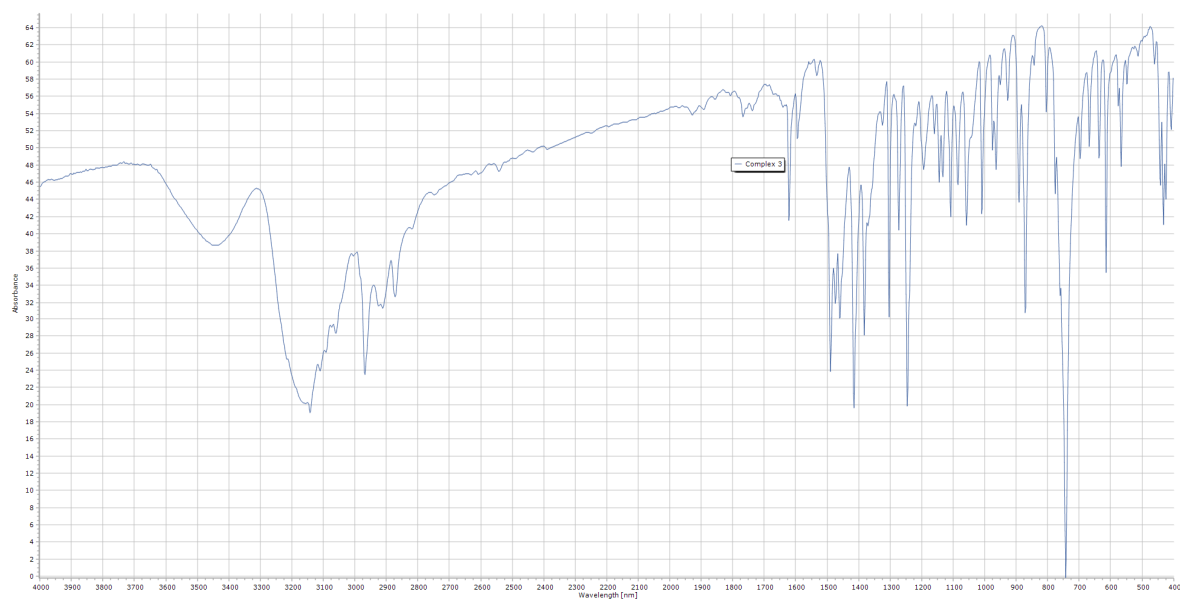

**Figure S14.** FT-IR spectrum of complex 3
